# Supplementary material for: Loss of Measles, Mumps, and Rubella Immunity in Pediatric Cancer Survivors Following Chemotherapy
Source: Research Square preprint supplement (doi:10.21203/rs.3.rs-7461224/v1), 2025-10-01
Supplement: Supplementary file 1 [file b7267f1d8d02ccd61c22d53a.docx]

| **Case** | **Sex** | **Diagnosis** | **BMI** | **Treatment** | **Age at 1st MMR dose**  **(months)** | **Age at 2nd MMR dose**  **(years)** | **Age at cancer diagnosis**  **(years)** | **Age at antibody testing (years)** | **Interval from end of chemotherapy to antibody testing (years)** |
| --- | --- | --- | --- | --- | --- | --- | --- | --- | --- |
| 1 | F | Optic glioma | 21.0 | CMT + others | 9.5 | 2.67 | 4.08 | 6.67 | 1.25 |
| 2 | M | Sarcoma | 14.6 | CMT + others | 9.5 | 2.5 | 3.58 | 5.17 | 0.50 |
| 3 | F | AML | 15.6 | CMT | 9.4 | 4.08 | 9.50 | 11.75 | 1.58 |
| 4 | F | AML | 19.6 | CMT | 12.1 | 2.58 | 6.17 | 8.58 | 1.67 |
| 5 | M | Melanoma | 20.8 | CMT + others | 9.2 | 6.75 | 10.83 | 13.83 | 1.08 |
| 6 | F | Yolk sac tumor | 16.7 | CMT + others | 10.4 | 4.92 | 10.58 | 12.83 | 2.00 |
| 7 | M | Germinoma | 25.5 | CMT + others | 12.3 | 4.17 | 11.00 | 13.42 | 2.17 |
| 8 | M | ALL | 17.0 | CMT | 9.57 | 4.0 | 6.17 | 12.67 | 3.33 |
| 9 | M | Retinoblastoma | 14.7 | CMT + others | 9.17 | 4.5 | 1.92 | 6.08 | 3.67 |
| 10 | M | Retinoblastoma | 18.1 | CMT + others | 12.13 | 3.5 | 1.75 | 8.08 | 5.50 |
| 11 | F | Retinoblastoma | 19.4 | CMT + others | 11.37 | 2.5 | 2.50 | 7.00 | 3.75 |

**Supplementary Table 1:** Clinical characteristics of 11 patients who remained seropositive for measles, mumps, and rubella

Abbreviation: F, female, M, male; BMI, body mass index; CMT, chemotherapy; MMR, measles, mumps, rubella
