# Supplementary material for: Loss of Measles, Mumps, and Rubella Immunity in Pediatric Cancer Survivors Following Chemotherapy
Source: Research Square preprint supplement (doi:10.21203/rs.3.rs-7461224/v1), 2025-10-01
Supplement: Supplementary file 2 [file cbc40abb7fca7e3d676b4e8c.docx]

**Supplement Table 2:** Distribution of serologic status for measles, mumps, and rubella

| **Measles** | **Mumps** | **Rubella** | **N = 54** |
| --- | --- | --- | --- |
| **+** | **+** | **+** | 11 |
| **+** | **+** | **-** | 2 |
| **+** | **-** | **+** | 4 |
| **+** | **-** | **-** | 2 |
| **-** | **+** | **+** | 5 |
| **-** | **+** | **-** | 6 |
| **-** | **-** | **+** | 15 |
| **-** | **-** | **-** | 9 |

Remarks: “**+**” indicates seropositive, “**-**” indicates seronegative
